# Supplementary material for: Structural and Immunochemical Studies of the Lipopolysaccharide from the Fish Pathogen, Aeromonas bestiarum Strain K296, Serotype O18
Source: Mar Drugs. 2013 Apr 17;11(4):1235–55. doi: 10.3390/md11041235 (PMC3705401; doi:10.3390/md11041235)

## Supplementary Information

**Figure S1.**  $^{13}\text{C}$  NMR (90 MHz) (A) and  $^1\text{H}$  NMR spectra (600 MHz) (B) of the *O*-deacetylated OPS of *A. bestiarum* strain K296. Capital letters and Arabic numerals refer to atoms in sugar residues denoted as shown in Table 2. A, Man $p$ ; B, terminal 6dTal $p$ ; C, 6dTal $p$ ; D, Gal $p$ NAc; NAc, *N*-acetyl group ( $\delta_{\text{C}}$  23.0;  $\delta_{\text{H}}$  2.05); IS, acetone as internal standard ( $\delta_{\text{C}}$  31.07); Spectra were recorded at 32 °C in  $\text{D}_2\text{O}$  as a solvent.

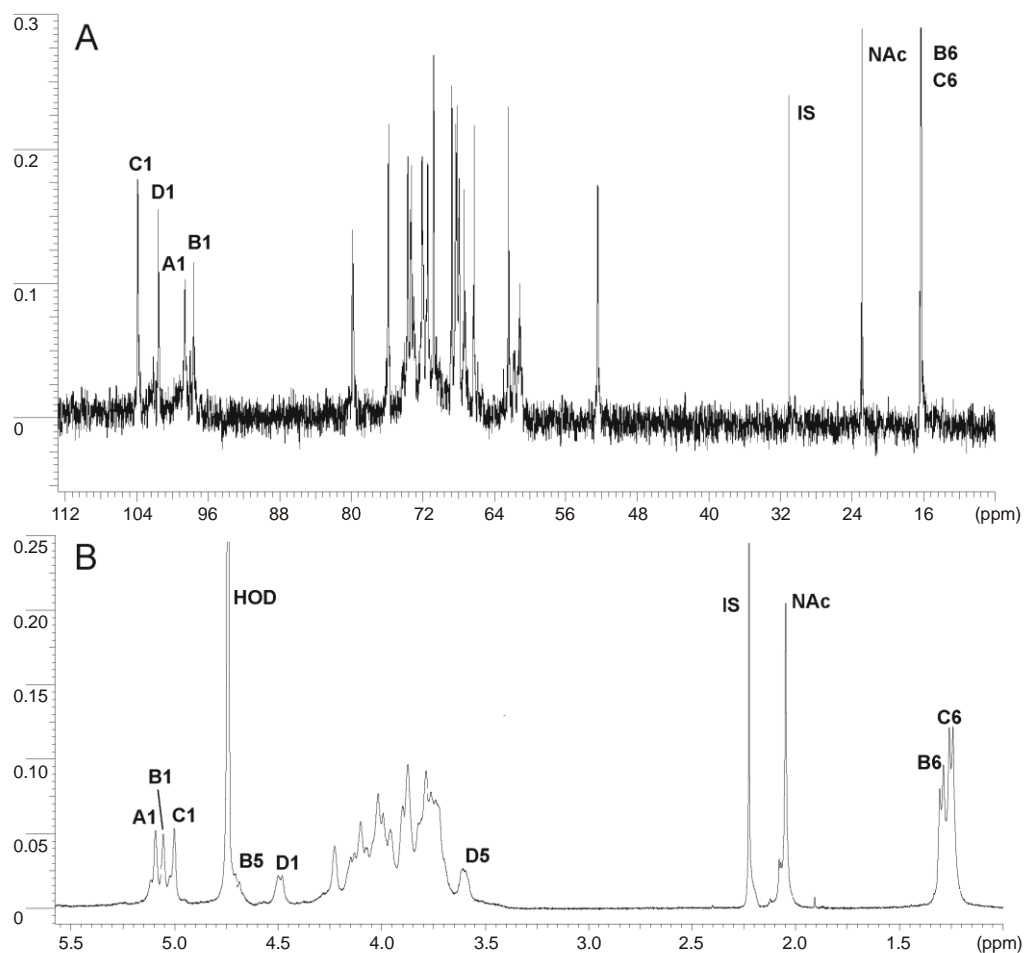

**Figure S2.** Part of a  $^1\text{H}$ - $^{13}\text{C}$  HSQC spectrum ( $600 \times 150$  MHz,  $\text{D}_2\text{O}$ ) of the initial OPS of *A. bestiarum* strain K296. The corresponding parts of the  $^1\text{H}$  and  $^{13}\text{C}$  NMR spectra are displayed along the horizontal and vertical axis, respectively. Capital letters and Arabic numerals refer to atoms in sugar residues, denoted as shown in Table 3. A', Manp; B' and B'', 2,4-di-*O*-acetylated terminal 6dTalp residues; B''', 3-*O*-acetylated terminal 6dTalp; C', 2-*O*-acetylated 6dTalp; D', GalpNAc.

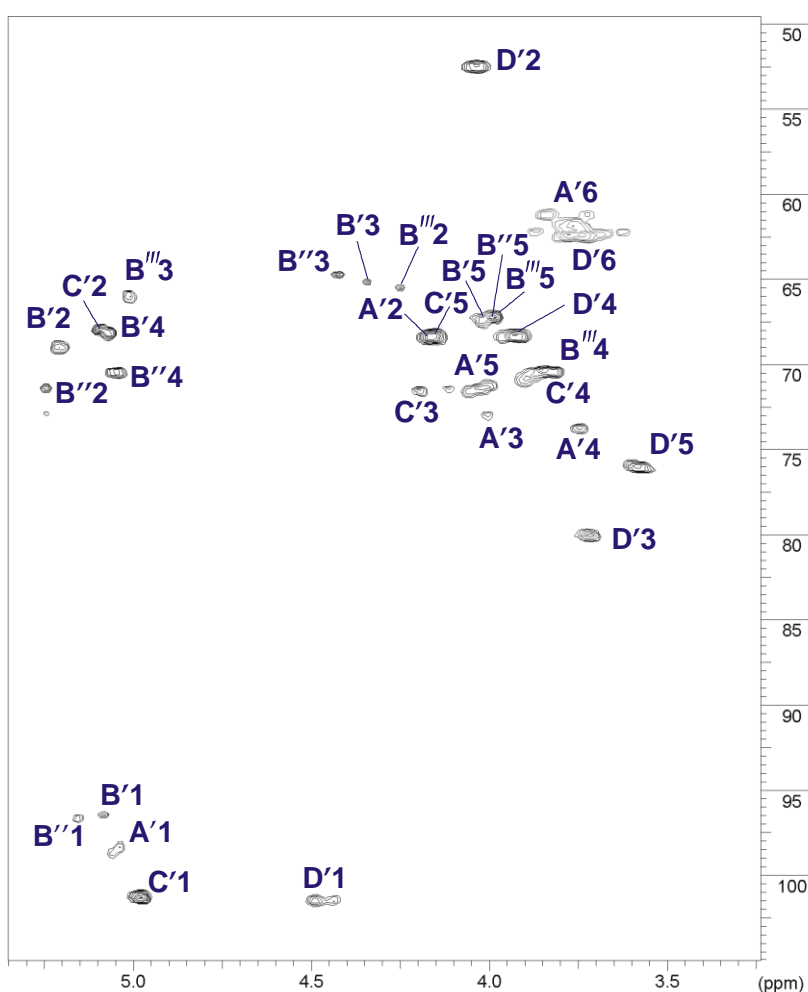

Supplement: Supplementary File 1 — Supplementary Information (PDF, 173 KB) [file marinedrugs-11-01235-s001.pdf]
